# Supplementary material
Source: ML conference proceedings conference paper supplement (https://proceedings.mlr.press/v48/shen16.html)
Supplement: Supplementary file 1 [file shen16-supp.pdf]

## A. Overview of the Appendix

In Section B, we derive the optimal solution  $U^*$  for (2.4), which was used in Section 2. Next, we clarify the implementation details of Algorithm 1 in Section C. We illustrate more experiments in Section D. In Section F, we prove our theoretical results and some preliminary lemmas are given in Section E.

## B. Optimal solution $U^*$ for (2.4)

The optimal solution  $U$  for (2.4) is given by the first order optimality condition:

$$\frac{\partial \tilde{h}(Y, D, U)}{\partial U} = U + \lambda_3(Y^\top Y U - Y^\top D) = 0,$$

which implies

$$\begin{aligned} U^* &= \left( \frac{1}{\lambda_3} I_p + Y^\top Y \right)^{-1} Y^\top D \\ &= \lambda_3 \sum_{j=0}^{+\infty} (-\lambda_3 Y^\top Y)^j Y^\top D \\ &= \lambda_3 Y^\top \left[ \sum_{j=0}^{+\infty} (-\lambda_3 Y Y^\top)^j \right] D \\ &= Y^\top \left( \frac{1}{\lambda_3} I_p + Y Y^\top \right)^{-1} D. \end{aligned}$$

Then, its transpose is given by

$$U^{*\top} = D^\top \left( \frac{1}{\lambda_3} I_p + \sum_{i=1}^n \mathbf{y}_i \mathbf{y}_i^\top \right)^{-1} Y.$$

Note that  $\mathbf{u}_i$  is the column of  $U^\top$ . So for each  $i \in [n]$ ,

$$\begin{aligned} \mathbf{u}_i^* &= D^\top \left( \frac{1}{\lambda_3} I_p + \sum_{i=1}^n \mathbf{y}_i \mathbf{y}_i^\top \right)^{-1} \mathbf{y}_i \\ &= \frac{1}{n} D^\top \left( \frac{1}{\lambda_3 n} I_p + \frac{1}{n} N_n \right)^{-1} \mathbf{y}_i, \end{aligned}$$

where we denote  $N_n = \sum_{i=1}^n \mathbf{y}_i \mathbf{y}_i^\top$ .

Also, we have

$$\begin{aligned} Y U^{*\top} &= Y \left( \frac{1}{\lambda_3} I_p + Y^\top Y \right)^{-1} Y^\top D \\ &= \lambda_3 Y \left( I_p + \lambda_3 Y^\top Y \right)^{-1} Y^\top D \\ &= \lambda_3 Y \left[ \sum_{j=0}^{+\infty} (-\lambda_3 Y^\top Y)^j \right] Y^\top D \\ &= \lambda_3 \sum_{j=0}^{+\infty} (-\lambda_3)^j (Y Y^\top)^{j+1} D \\ &= D - \left( I_p + \lambda_3 Y Y^\top \right)^{-1} D \\ &= D - \left( I_p + \lambda_3 \sum_{i=1}^n \mathbf{y}_i \mathbf{y}_i^\top \right)^{-1} D \\ &= D - \frac{1}{n} \left( \frac{1}{n} I_p + \frac{\lambda_3}{n} N_n \right)^{-1} D. \end{aligned}$$

Thus,

$$\begin{aligned} h(Y, D) &= \sum_{i=1}^n \frac{1}{2} \left\| \frac{1}{n} D^\top \left( \frac{1}{\lambda_3 n} I_p + \frac{1}{n} N_n \right)^{-1} \mathbf{y}_i \right\|_2^2 \\ &\quad + \frac{\lambda_3}{2} \left\| \frac{1}{n} \left( \frac{1}{n} I_p + \frac{\lambda_3}{n} N_n \right)^{-1} D \right\|_F^2 \\ &= \frac{1}{n^2} \sum_{i=1}^n \frac{1}{2} \left\| D^\top \left( \frac{1}{\lambda_3 n} I_p + \frac{1}{n} N_n \right)^{-1} \mathbf{y}_i \right\|_2^2 \\ &\quad + \frac{\lambda_3}{2n^2} \left\| \left( \frac{1}{n} I_p + \frac{\lambda_3}{n} N_n \right)^{-1} D \right\|_F^2. \end{aligned}$$

## C. Algorithm Details

---

### Algorithm 2 Solving $\mathbf{v}$ and $\mathbf{e}$

---

**Require:**  $D \in \mathbb{R}^{p \times d}$ ,  $\mathbf{z} \in \mathbb{R}^p$ , parameters  $\lambda_1$  and  $\lambda_2$

**Ensure:** Optimal  $\mathbf{v}$  and  $\mathbf{e}$ .

- 1: Set  $\mathbf{e} = \mathbf{0}$ .
- 2: **repeat**
- 3:     Update  $\mathbf{v}$ :

$$\mathbf{v} = \left( D^\top D + \frac{1}{\lambda_1} I \right)^{-1} D^\top (\mathbf{z} - \mathbf{e}).$$

- 4:     Update  $\mathbf{e}$ :

$$\mathbf{e} = \mathcal{S}_{\lambda_2/\lambda_1}[\mathbf{z} - D\mathbf{v}].$$

- 5: **until** convergence
- 

For Algorithm 2, we set a threshold  $\epsilon = 10^{-3}$ . Let  $\{\mathbf{v}', \mathbf{e}'\}$  and  $\{\mathbf{v}'', \mathbf{e}''\}$  be the two consecutive iterates. If the maximum of  $\|\mathbf{v}' - \mathbf{v}''\|_2 / \|\mathbf{v}'\|_2$  and  $\|\mathbf{e}' - \mathbf{e}''\|_2 / \|\mathbf{e}'\|_2$  is less than  $\epsilon$ , then we stop Algorithm 2.

**Algorithm 3** Solving  $D$ 

**Require:**  $D \in \mathbb{R}^{p \times d}$  in the previous iteration, accumulation matrix  $M$ ,  $A$  and  $B$ , parameters  $\lambda_1$  and  $\lambda_3$ .

**Ensure:** Optimal  $D$  (updated).

- 1: Denote  $\hat{A} = \lambda_1 A + \lambda_3 I$  and  $\hat{B} = \lambda_1 B + \lambda_3 M$ .
- 2: **repeat**
- 3:   **for**  $j = 1$  to  $d$  **do**
- 4:     Update the  $j$ th column of  $D$ :

$$\mathbf{d}_j \leftarrow \mathbf{d}_j - \frac{1}{\hat{A}_{jj}} \left( D \hat{\mathbf{a}}_j - \hat{\mathbf{b}}_j \right)$$

- 5:   **end for**
- 6: **until** convergence

For Algorithm 3, we observe that a one-pass update on the dictionary  $D$  is enough for the final convergence of  $D$ , as we shown in the experiments. This is also observed in Mairal et al. (2010).

## D. More Experiments

We also investigate the performance of subspace clustering on MNIST-7K and MNIST-10K. In this way, one can see how the computational time changes with the number of samples.

Table 4. Clustering accuracy (%) and computational time (seconds).

|           | OLRSC        | ORPCA | LRR    | LRR2  | SSC          |
|-----------|--------------|-------|--------|-------|--------------|
| Mushrooms | <b>85.09</b> | 65.26 | 58.44  | 56.38 | 54.16        |
|           | 8.78         | 8.30  | 46.82  | 8.55  | 32 min       |
| DNA       | <b>67.11</b> | 53.11 | 44.01  | 45.32 | 52.23        |
|           | 2.58         | 2.09  | 23.67  | 1.65  | 3 min        |
| Protein   | 43.30        | 40.22 | 40.31  | 40.00 | <b>44.27</b> |
|           | 24.66        | 22.90 | 921.58 | 98.33 | 65 min       |
| USPS      | <b>65.95</b> | 55.70 | 52.98  | 58.69 | 47.58        |
|           | 33.93        | 27.01 | 257.25 | 71.15 | 50 min       |
| MNIST-7K  | <b>58.04</b> | 55.40 | 54.77  | 54.27 | 45.56        |
|           | 42.99        | 39.84 | 512.37 | 95.21 | 26 min       |
| MNIST-10K | <b>56.79</b> | 54.66 | 55.15  | 53.67 | 44.90        |
|           | 67           | 56    | 24 min | 153   | 84 min       |
| MNIST-20K | <b>57.74</b> | 54.10 | 55.23  | 54.53 | 43.91        |
|           | 129          | 121   | 32 min | 360   | 7 hours      |

## E. Proof Preliminaries

**Lemma 3** (Corollary of Thm. 4.1 (Bonnans & Shapiro, 1998)). Let  $f : \mathbb{R}^p \times \mathbb{R}^q \rightarrow \mathbb{R}$ . Suppose that for all  $\mathbf{x} \in \mathbb{R}^p$  the function  $f(\mathbf{x}, \cdot)$  is differentiable, and that  $f$  and  $\nabla_{\mathbf{u}} f(\mathbf{x}, \mathbf{u})$  are continuous on  $\mathbb{R}^p \times \mathbb{R}^q$ . Let  $\mathbf{v}(\mathbf{u})$  be

the optimal value function  $\mathbf{v}(\mathbf{u}) = \min_{\mathbf{x} \in \mathcal{C}} f(\mathbf{x}, \mathbf{u})$ , where  $\mathcal{C}$  is a compact subset of  $\mathbb{R}^p$ . Then  $\mathbf{v}(\mathbf{u})$  is directionally differentiable. Furthermore, if for  $\mathbf{u}_0 \in \mathbb{R}^q$ ,  $f(\cdot, \mathbf{u}_0)$  has unique minimizer  $\mathbf{x}_0$  then  $\mathbf{v}(\mathbf{u})$  is differentiable in  $\mathbf{u}_0$  and  $\nabla_{\mathbf{u}} \mathbf{v}(\mathbf{u}_0) = \nabla_{\mathbf{u}} f(\mathbf{x}_0, \mathbf{u}_0)$ .

**Lemma 4** (Corollary of Donsker theorem (van der Vaart, 2000)). Let  $F = \{f_{\theta} : \mathcal{X} \rightarrow \mathbb{R}, \theta \in \Theta\}$  be a set of measurable functions indexed by a bounded subset  $\Theta$  of  $\mathbb{R}^d$ . Suppose that there exists a constant  $K$  such that

$$|f_{\theta_1}(x) - f_{\theta_2}(x)| \leq K \|\theta_1 - \theta_2\|_2,$$

for every  $\theta_1$  and  $\theta_2$  in  $\Theta$  and  $x$  in  $\mathcal{X}$ . Then,  $F$  is  $P$ -Donsker. For any  $f$  in  $F$ , let us define  $\mathbb{P}_n f$ ,  $\mathbb{P} f$  and  $\mathbb{G}_n f$  as

$$\begin{aligned} \mathbb{P}_n f &= \frac{1}{n} \sum_{i=1}^n f(X_i), \\ \mathbb{P} f &= \mathbb{E}[f(X)], \\ \mathbb{G}_n f &= \sqrt{n}(\mathbb{P}_n f - \mathbb{P} f). \end{aligned}$$

Let us also suppose that for all  $f$ ,  $\mathbb{P} f^2 < \delta^2$  and  $\|f\|_{\infty} < M$  and that the random elements  $X_1, X_2, \dots$  are Borel-measurable. Then, we have

$$\mathbb{E} \|\mathbb{G}\|_F = O(1),$$

where  $\|\mathbb{G}\|_F = \sup_{f \in F} |\mathbb{G}_n f|$ .

**Lemma 5** (Sufficient condition of convergence for a stochastic process (Bottou, 1998)). Let  $(\Omega, \mathcal{F}, P)$  be a measurable probability space,  $u_t$ , for  $t \geq 0$ , be the realization of a stochastic process and  $\mathcal{F}_t$  be the filtration by the past information at time  $t$ . Let

$$\delta_t = \begin{cases} 1 & \text{if } \mathbb{E}[u_{t+1} - u_t | \mathcal{F}_t] > 0, \\ 0 & \text{otherwise.} \end{cases}$$

If for all  $t$ ,  $u_t \geq 0$  and  $\sum_{t=1}^{\infty} \mathbb{E}[\delta_t(u_{t+1} - u_t)] < \infty$ , then  $u_t$  is a quasi-martingale and converges almost surely. Moreover,

$$\sum_{t=1}^{\infty} |\mathbb{E}[u_{t+1} - u_t | \mathcal{F}_t]| < +\infty \text{ a.s.}$$

**Lemma 6** (Lemma 8 from Mairal et al. (2010)). Let  $a_t, b_t$  be two real sequences such that for all  $t$ ,  $a_t \geq 0, b_t \geq 0, \sum_{t=1}^{\infty} a_t = \infty, \sum_{t=1}^{\infty} a_t b_t < \infty, \exists K > 0$ , such that  $|b_{t+1} - b_t| < K a_t$ . Then,  $\lim_{t \rightarrow +\infty} b_t = 0$ .

## F. Proof Details

### F.1. Proof of Boundedness

**Proposition 7.** Let  $\{\mathbf{u}_t\}, \{\mathbf{v}_t\}, \{\mathbf{e}_t\}$  and  $\{D_t\}$  be the optimal solutions produced by Algorithm 1. Then,

1.  $\mathbf{v}_t, \mathbf{e}_t, \frac{1}{t}A_t$  and  $\frac{1}{t}B_t$  are uniformly bounded.
2.  $M_t$  is uniformly bounded.
3.  $D_t$  is supported by some compact set  $\mathcal{D}$ .
4.  $\mathbf{u}_t$  is uniformly bounded.

*Proof.* Let us consider the optimization problem of solving  $\mathbf{v}$  and  $\mathbf{e}$ . As the trivial solution  $\{\mathbf{v}'_t, \mathbf{e}'_t\} = \{\mathbf{0}, \mathbf{z}_t\}$  are feasible, we have

$$\tilde{\ell}_1(\mathbf{z}_t, D_{t-1}, \mathbf{v}'_t, \mathbf{e}'_t) = \lambda_2 \|\mathbf{z}_t\|_1.$$

Therefore, the optimal solution should satisfy:

$$\frac{\lambda_1}{2} \|\mathbf{z}_t - D_{t-1}\mathbf{v}_t - \mathbf{e}_t\|_2^2 + \frac{1}{2} \|\mathbf{v}_t\|_2^2 + \lambda_2 \|\mathbf{e}_t\|_1 \leq \lambda_2 \|\mathbf{z}_t\|_1,$$

which implies

$$\begin{aligned} \frac{1}{2} \|\mathbf{v}_t\|_2^2 &\leq \lambda_2 \|\mathbf{z}_t\|_1, \\ \lambda_2 \|\mathbf{e}_t\|_1 &\leq \lambda_2 \|\mathbf{z}_t\|_1. \end{aligned}$$

Since  $\mathbf{z}_t$  is uniformly bounded (Assumption 1),  $\mathbf{v}_t$  and  $\mathbf{e}_t$  are uniformly bounded.

To examine the uniform bound for  $\frac{1}{t}A_t$  and  $\frac{1}{t}B_t$ , note that

$$\begin{aligned} \frac{1}{t}A_t &= \frac{1}{t} \sum_{i=1}^t \mathbf{v}_i \mathbf{v}_i^\top, \\ \frac{1}{t}B_t &= \frac{1}{t} \sum_{i=1}^t (\mathbf{z}_i - \mathbf{e}_i) \mathbf{v}_i^\top. \end{aligned}$$

Since for each  $i$ ,  $\mathbf{v}_i, \mathbf{e}_i$  and  $\mathbf{z}_i$  are uniformly bounded,  $\frac{1}{t}A_t$  and  $\frac{1}{t}B_t$  are uniformly bounded.

Now we derive the bound for  $M_t$ . All the information we have is:

1.  $M_t = \sum_{i=1}^t \mathbf{y}_i \mathbf{u}_i^\top$  (definition of  $M_t$ ).
2.  $\mathbf{u}_t = (\|\mathbf{y}_t\|_2^2 + \frac{1}{\lambda_3})^{-1} (D_{t-1} - M_{t-1})^\top \mathbf{y}_t$  (closed form solution).
3.  $D_t(\lambda_1 A_t + \lambda_3 I) = \lambda_1 B_t + \lambda_3 M_t$  (first order optimality condition for  $D_t$ ).
4.  $\frac{1}{t}A_t, \frac{1}{t}B_t, \frac{1}{t}N_t$  are uniformly upper bounded (Claim 1).
5. The smallest singular values of  $\frac{1}{t}N_t$  and  $\frac{1}{t}A_t$  are uniformly lower bounded away from zero (Assumption 2 and 3).

For simplicity, we write  $D_t$  as:

$$D_t = (\lambda_1 B_t + \lambda_3 M_t) Q_t^{-1}, \quad (\text{F.1})$$

where

$$Q_t = \lambda_1 A_t + \lambda_3 I.$$

Note that as we assume  $\frac{1}{t}A_t$  is positive definite,  $Q_t$  is always invertible.

From the definition of  $M_t$  and (3.4), we know that

$$\begin{aligned} M_{t+1} - M_t &= \mathbf{y}_{t+1} \mathbf{u}_{t+1}^\top \\ &= \left( \|\mathbf{y}_{t+1}\|_2^2 + \frac{1}{\lambda_3} \right)^{-1} \mathbf{y}_{t+1} \mathbf{y}_{t+1}^\top (D_t - M_t) \\ &= P_t D_t - P_t M_t \\ &= P_t (\lambda_1 B_t + \lambda_3 M_t) Q_t^{-1} - P_t M_t, \end{aligned} \quad (\text{F.2})$$

where

$$P_t = \left( \|\mathbf{y}_{t+1}\|_2^2 + \frac{1}{\lambda_3} \right)^{-1} \mathbf{y}_{t+1} \mathbf{y}_{t+1}^\top.$$

By multiplying  $Q_t$  on both sides of (F.2), we have

$$M_{t+1} = (M_t - \lambda_1 P_t M_t A_t Q_t^{-1}) + \lambda_1 P_t B_t Q_t^{-1}. \quad (\text{F.3})$$

By applying the Taylor expansion on  $Q_t^{-1}$ , we have

$$Q_t^{-1} = (\lambda_1 A_t + \lambda_3 I_d)^{-1} = \frac{1}{\lambda_3} \sum_{i=0}^{+\infty} \left( -\frac{\lambda_1}{\lambda_3} A_t \right)^i.$$

Thus,

$$\begin{aligned} A_t Q_t^{-1} &= \frac{1}{\lambda_3} \sum_{i=0}^{+\infty} \left( -\frac{\lambda_1}{\lambda_3} \right)^i (A_t)^{i+1} \\ &= -\frac{1}{\lambda_1} \sum_{i=0}^{+\infty} \left( -\frac{\lambda_1}{\lambda_3} A_t \right)^{i+1} \\ &= -\frac{1}{\lambda_1} \left[ \sum_{i=-1}^{+\infty} \left( -\frac{\lambda_1}{\lambda_3} A_t \right)^{i+1} - I_d \right] \\ &= -\frac{1}{\lambda_1} \left( I_d + \frac{\lambda_1}{\lambda_3} A_t \right)^{-1} + \frac{1}{\lambda_1} I_d. \end{aligned}$$

So  $M_{t+1}$  is given by

$$\begin{aligned} M_{t+1} &= (I_d - P_t) M_t \\ &\quad + \underbrace{P_t M_t \left( I_d + \frac{\lambda_1}{\lambda_3} A_t \right)^{-1}}_{W_t} + \lambda_1 P_t B_t Q_t^{-1}. \end{aligned} \quad (\text{F.4})$$

We first show that  $P_t B_t Q_t^{-1}$  is uniformly bounded.

$$\begin{aligned} \|P_t B_t Q_t^{-1}\| &= \left\| P_t \left( \frac{1}{t} B_t \right) \left( \frac{1}{t} Q_t \right)^{-1} \right\| \\ &\leq \|P_t\| \cdot \left\| \frac{1}{t} B_t \right\| \cdot \left\| \left( \frac{1}{t} Q_t \right)^{-1} \right\|. \end{aligned}$$

Since we assume that  $\{z_t\}$  are uniformly upper bounded (Assumption 1), there exists a constant  $\alpha_1$ , such that for all  $t > 0$ ,

$$\|z_t\|_2 \leq \alpha_1.$$

So we have

$$\|P_{t+1}\| \leq \frac{\lambda_3 \alpha_1^2}{\lambda_3 \alpha_1^2 + 1}.$$

Next, as we have shown that  $\frac{1}{t} B_t$  can be uniformly bounded, there exists a constant  $c_1$ , such that for all  $t > 0$ ,

$$\left\| \frac{1}{t} B_t \right\| \leq c_1.$$

And,

$$\begin{aligned} \left\| \left( \frac{1}{t} Q_t \right)^{-1} \right\| &= \frac{1}{\sigma_{\min} \left( \frac{1}{t} Q_t \right)} \\ &= \frac{1}{\sigma_{\min} \left( \frac{\lambda_1}{t} A_t + \frac{\lambda_3}{t} I_d \right)} \\ &= \frac{1}{\frac{\lambda_3}{t} + \lambda_1 \sigma_{\min} \left( \frac{1}{t} A_t \right)} \\ &\leq \frac{1}{\lambda_3 + \lambda_1 \beta_0}. \end{aligned}$$

Thus,  $\lambda_1 P_t B_t Q_t^{-1}$  is uniformly bounded by a constant, say  $c_2$ . That is,

$$\|\lambda_1 P_t B_t Q_t^{-1}\| \leq c_2. \quad (\text{F.5})$$

It follows that  $W_t$  can be bounded:

$$\begin{aligned} \|W_t\| &\leq \|P_t\| \cdot \|M_t\| \cdot \left\| \left( I_d + \frac{\lambda_1}{\lambda_3} A_t \right)^{-1} \right\| + c_2 \\ &\stackrel{\zeta_1}{\leq} \frac{\alpha_1^2}{\alpha_1^2 + \frac{1}{\lambda_3}} \cdot \frac{\lambda_3}{\lambda_3 + \lambda_1 \beta_0 t} \|M_t\| + c_2 \\ &\leq \frac{c_3}{t} \|M_t\| + c_2, \end{aligned} \quad (\text{F.6})$$

where  $\zeta_1$  is derived by utilizing the assumption that  $z$  is upper bounded by  $\alpha_1$  and the smallest singular value of  $\frac{1}{t} A_t$  is lower bounded by  $\beta_0$ . The last inequality always holds for some uniform constant  $c_3$ .

From Assumption 2, we know that the singular values of  $\frac{1}{t} \sum_{i=1}^t z_i z_i^\top$  should uniformly span the diagonal. Thus, there exists a constant  $\tau$ , such that for all  $i > 0$ ,  $\frac{1}{\tau} \sum_{i=1}^{i+\tau} z_i z_i^\top$  is uniformly bounded away from zero with high probability.

Let  $m_1 = \|M_1\|$ . Now we pick a constant  $t^*$ , such that

$$\frac{c_3 \tau}{t^*} \left( \frac{1}{\alpha_0} + 1 \right) \leq 0.5. \quad (\text{F.7})$$

We also have a constant  $w^*$ , such that for all  $t \leq t^*$ ,

$$\begin{aligned} \|W_t\| &\leq w^*, \\ \frac{c_3}{t} m_1 + 0.5 w^* + c_2 &\leq w^*. \end{aligned} \quad (\text{F.8})$$

Based on this, we first derive a bound for all  $\|M_t\|$ , with  $t \leq t^*$ . We know that there exists an integer  $k^*$  (which is a uniform constant), such that  $k^*(\tau + 1) \leq t^* < (k^* + 1)(\tau + 1)$ . Our strategy is to bound  $\|M_t\|$  in each interval  $[(k-1)(\tau+1), k(\tau+1)]$ . We start our reasoning from the first interval  $[1, \tau + 1]$ .

It is easy to induce from (F.4) that for all  $t > 0$ ,

$$M_{t+1} = \prod_{i=1}^t (I_p - P_i) M_1 + \sum_{j=1}^{t-1} \prod_{i=j+1}^t (I_p - P_i) W_j + W_t.$$

Thus,

$$\begin{aligned} &\|M_{\tau+1}\| \\ &= \left\| \prod_{i=1}^{\tau} (I_p - P_i) M_1 + \sum_{j=1}^{\tau-1} \prod_{i=j+1}^{\tau} (I_p - P_i) W_j + W_{\tau} \right\| \\ &\leq \left\| \prod_{i=1}^{\tau} (I_p - P_i) M_1 \right\| + \left\| \sum_{j=1}^{\tau-1} \prod_{i=j+1}^{\tau} (I_p - P_i) W_j + W_{\tau} \right\| \\ &\stackrel{\zeta_1}{\leq} \left\| \prod_{i=1}^{\tau} (I_p - P_i) \right\| \cdot \|M_1\| + \tau w^* \\ &\stackrel{\zeta_2}{\leq} (1 - \alpha_0) m_1 + \tau w^*. \end{aligned}$$

Here,  $\zeta_1$  holds because  $\left\| \prod_{i=j+1}^{\tau} (I_p - P_i) \right\| \leq 1$  for all  $j \in [\tau - 1]$ .  $\zeta_2$  holds because the singular values of  $P_i$ 's have span over the diagonal so the largest singular value of  $\prod_{i=1}^{\tau} (I_p - P_i)$  is  $1 - \alpha_0$ , where  $\alpha_0$  is the lower bound for all  $z_i$ 's (see Assumption 1).

For  $M_{2(\tau+1)}$ , we can similarly obtain

$$\|M_{2(\tau+1)}\| \leq (1 - \alpha_0)^2 m_1 + (1 - \alpha_0) \tau w^* + \tau w^*.$$

More generally, for any integer  $k \leq k^*$ ,

$$\begin{aligned} \|M_{k(\tau+1)}\| &\leq (1-\alpha_0)^k m_1 + \sum_{j=0}^{k-1} (1-\alpha_0)^j \tau w^* \\ &\leq m_1 + \frac{\tau w^*}{\alpha_0}. \end{aligned}$$

Hence, we obtain a uniform bound for  $\|M_{k(\tau+1)}\|$ , with  $k \in [k^*]$ . For any  $i \in ((k-1)(\tau+1), k(\tau+1))$ , they can simply be bounded by

$$\begin{aligned} \|M_i\| &\leq m_1 + \frac{\tau w^*}{\alpha_0} + (i - (k-1)(\tau+1))w^* \\ &\leq m_1 + \frac{\tau w^*}{\alpha_0} + \tau w^*. \end{aligned}$$

Therefore, for all the current  $M_t$ 's, we can bound them as follows:

$$\|M_t\| \leq m_1 + \frac{\tau w^*}{\alpha_0} + \tau w^*, \quad \forall t = 1, 2, \dots, t^*. \quad (\text{F.9})$$

From (F.8) and (F.9), we know that for all  $t \leq t^*$ ,

$$\begin{aligned} \|W_t\| &\leq w^*, \\ \|M_t\| &\leq m_1 + \frac{\tau w^*}{\alpha_0} + \tau w^*. \end{aligned}$$

Next, we show that the bounds still hold for  $\|W_{t^*+1}\|$  and  $\|M_{t^*+1}\|$ , which completes our induction.

For  $\|M_{t^*+1}\|$ , it can simply be bounded in the same way as aforementioned because all the  $W_t$ 's are bounded by  $w^*$  for  $t < t^* + 1$ . That is,

$$\begin{aligned} \|M_{t^*+1}\| &\leq \|M_{k^*(\tau+1)}\| + (t^* + 1 - k^*(\tau+1))w^* \\ &\leq m_1 + \frac{\tau w^*}{\alpha_0} + \tau w^*. \end{aligned} \quad (\text{F.10})$$

For  $\|W_{t^*+1}\|$ , from (F.6), we know

$$\begin{aligned} \|W_{t^*+1}\| &\leq \frac{c_3}{t^*+1} \|M_{t^*+1}\| + c_2 \\ &\leq \frac{c_3}{t^*+1} (m_1 + \frac{\tau w^*}{\alpha_0} + \tau w^*) + c_2 \\ &= \frac{c_3 m_1}{t^*+1} + \frac{c_3 \tau}{t^*+1} (\frac{1}{\alpha_0} + 1) w^* + c_2 \\ &\stackrel{\zeta_1}{\leq} \frac{c_3 m_1}{t^*+1} + 0.5 w^* + c_2 \\ &\stackrel{\zeta_2}{\leq} w^*. \end{aligned} \quad (\text{F.11})$$

Here,  $\zeta_1$  is derived by utilizing (F.7) and  $\zeta_2$  is derived by (F.8).

From (F.10) and (F.11), we know that the bound for  $\|M_t\|$  and  $\|W_t\|$ 's, with  $t \leq t^*$ , still holds for  $t = t^* + 1$ . Thus

we complete the induction and conclude that for all  $t > 0$ , we have

$$\begin{aligned} \|M_t\| &\leq m_1 + \frac{\tau w^*}{\alpha_0} + \tau w^*, \\ \|W_t\| &\leq w^*. \end{aligned}$$

Thus,  $M_t$  is uniformly bounded.

From (F.1), we know that

$$\begin{aligned} D_t &= \lambda_1 B_t (\lambda_1 A_t + \lambda_3 I_d)^{-1} + \lambda_3 M_t (\lambda_1 A_t + \lambda_3 I_d)^{-1} \\ &= \lambda_1 \left( \frac{1}{t} B_t \right) \left( \frac{\lambda_1}{t} A_t + \frac{\lambda_3}{t} I_d \right)^{-1} \\ &\quad + \frac{\lambda_3}{t} M_t \left( \frac{\lambda_1}{t} A_t + \frac{\lambda_3}{t} I_d \right)^{-1}. \end{aligned}$$

Since  $\frac{1}{t} A_t$ ,  $\frac{1}{t} B_t$  and  $M_t$  are all uniformly bounded,  $D_t$  is also uniformly bounded.

By examining the closed form of  $\mathbf{u}_t$ , and note that we have proved the uniform boundedness of  $D_t$  and  $M_t$ , we conclude that  $\{\mathbf{u}_t\}$  are uniformly bounded.  $\square$

**Corollary 8.** *Let  $\mathbf{v}_t$ ,  $\mathbf{e}_t$ ,  $\mathbf{u}_t$  and  $D_t$  be the optimal solutions produced by Algorithm 1.*

1.  $\tilde{\ell}(\mathbf{z}_t, D_t, \mathbf{v}_t, \mathbf{e}_t)$  and  $\ell(\mathbf{z}_t, D_t)$  are uniformly bounded.
2.  $\frac{1}{t} \tilde{h}(Z, D, U)$  is uniformly bounded.
3. The surrogate function  $g_t(D_t)$  defined in (3.5) is uniformly bounded and Lipschitz.

*Proof.* To show Claim 1, we just need to examine the definition of  $\tilde{\ell}(\mathbf{z}_t, D_t, \mathbf{v}_t, \mathbf{e}_t)$  and notice that  $\mathbf{z}_t$ ,  $D_t$ ,  $\mathbf{v}_t$  and  $\mathbf{e}_t$  are all uniformly bounded. This implies that  $\tilde{\ell}(\mathbf{z}_t, D_t, \mathbf{v}_t, \mathbf{e}_t)$  is uniformly bounded and so is  $\ell(\mathbf{z}_t, D_t)$ . Likewise, we show that  $\frac{1}{t} \tilde{h}(Z, D, U)$  is uniformly bounded.

The uniform boundedness of  $g_t(D_t)$  follows immediately as  $\tilde{\ell}(\mathbf{z}_t, D_t, \mathbf{v}_t, \mathbf{e}_t)$  and  $\frac{1}{t} \tilde{h}(Z, D, U)$  are both uniformly bounded. To show that  $g_t(D)$  is Lipschitz, we show that the gradient of  $g_t(D)$  is uniformly bounded for all  $D \in \mathcal{D}$ .

$$\begin{aligned} \|\nabla g_t(D)\|_F &= \left\| \lambda_1 D \left( \frac{A_t}{t} + \frac{\lambda_3}{t} I_d \right) - \lambda_1 \frac{B_t}{t} - \frac{\lambda_3}{t} M_t \right\|_F \\ &\leq \lambda_1 \|D\|_F \left( \left\| \frac{A_t}{t} \right\|_F + \left\| \frac{\lambda_3}{t} I_d \right\|_F \right) \\ &\quad + \lambda_1 \left\| \frac{B_t}{t} \right\|_F + \left\| \frac{\lambda_3}{t} M_t \right\|_F. \end{aligned}$$

Notice that each term on the right side of the inequality is uniformly bounded. Thus the gradient of  $g_t(D)$  is uniformly bounded and  $g_t(D)$  is Lipschitz.  $\square$

**Proposition 9.** Let  $D \in \mathcal{D}$  and denote the minimizer of  $\tilde{\ell}(\mathbf{z}, D, \mathbf{v}, \mathbf{e})$  as:

$$\{\mathbf{v}', \mathbf{e}'\} = \arg \min_{\mathbf{v}, \mathbf{e}} \tilde{\ell}(\mathbf{z}, D, \mathbf{v}, \mathbf{e}).$$

Then, the function  $\ell(\mathbf{z}, L)$  is continuously differentiable and

$$\nabla_D \ell(\mathbf{z}, D) = (D\mathbf{v}' + \mathbf{e}' - \mathbf{z})\mathbf{v}'^\top.$$

Furthermore,  $\ell(\mathbf{z}, \cdot)$  is uniformly Lipschitz.

*Proof.* By fixing the variable  $\mathbf{z}$ , the function  $\tilde{\ell}$  can be seen as a mapping:

$$\begin{aligned} \mathbb{R}^{d+p} \times \mathcal{D} &\rightarrow \mathbb{R} \\ ([\mathbf{v}; \mathbf{e}], D) &\mapsto \tilde{\ell}(\mathbf{z}, D, \mathbf{v}, \mathbf{e}). \end{aligned}$$

It is easy to show that for all  $[\mathbf{v}; \mathbf{e}] \in \mathbb{R}^{d+p}$ ,  $\tilde{\ell}(\mathbf{z}, \cdot, \mathbf{v}, \mathbf{e})$  is differentiable. Also  $\tilde{\ell}(\mathbf{z}, \cdot, \cdot, \cdot)$  is continuous on  $\mathbb{R}^{d+p} \times \mathcal{D}$ .  $\nabla_D \tilde{\ell}(\mathbf{z}, D, \mathbf{v}, \mathbf{e}) = (D\mathbf{v} + \mathbf{e} - \mathbf{z})\mathbf{v}^\top$  is continuous on  $\mathbb{R}^{d+p} \times \mathcal{D}$ .  $\forall D \in \mathcal{D}$ , since  $\tilde{\ell}(\mathbf{z}, D, \mathbf{v}, \mathbf{e})$  is strongly convex w.r.t.  $\mathbf{v}$ , it has a unique minimizer  $\{\mathbf{v}', \mathbf{e}'\}$ . Thus Lemma 3 applies and we prove that  $\ell(\mathbf{z}, D)$  is differentiable in  $D$  and

$$\nabla_D \ell(\mathbf{z}, D) = (D\mathbf{v}' + \mathbf{e}' - \mathbf{z})\mathbf{v}'^\top.$$

Since every term in  $\nabla_D \ell(\mathbf{z}, D)$  is uniformly bounded (Assumption 1 and Proposition 7), we conclude that the gradient of  $\ell(\mathbf{z}, D)$  is uniformly bounded, implying that  $\ell(\mathbf{z}, D)$  is uniformly Lipschitz w.r.t.  $D$ .  $\square$

**Corollary 10.** Let  $f_t(D)$  be the empirical loss function defined in (2.6). Then  $f_t(D)$  is uniformly bounded and Lipschitz.

*Proof.* Since  $\ell(\mathbf{z}, L)$  can be uniformly bounded (Corollary 8), we only need to show that  $\frac{1}{t}h(Z, D)$  is uniformly bounded. Note that we have derived the form for  $h(Z, D)$  as follows:

$$\begin{aligned} \frac{1}{t}h(Z, D) &= \frac{1}{t^3} \sum_{i=1}^t \frac{1}{2} \left\| D^\top \left( \frac{1}{\lambda_3 t} I_p + \frac{1}{t} N_t \right)^{-1} \mathbf{z}_i \right\|_2^2 \\ &\quad + \frac{\lambda_3}{2t^3} \left\| \left( \frac{1}{t} I_p + \frac{\lambda_3}{t} N_t \right)^{-1} D \right\|_F^2 \end{aligned}$$

where  $N_t = \sum_{i=1}^t \mathbf{z}_i \mathbf{z}_i^\top$ . Since every term in the above equation can be uniformly bounded,  $h(Z, D)$  is uniformly bounded and so is  $f_t(D)$ .

To show that  $f_t(D)$  is uniformly Lipschitz, we show that its gradient can be uniformly bounded.

$$\begin{aligned} &\nabla f_t(D) \\ &= \frac{1}{t} \sum_{i=1}^t \nabla \ell(\mathbf{z}_i, D) + \frac{1}{t} \nabla h(Z, D) \\ &= \frac{1}{t} \sum_{i=1}^t (D\mathbf{v}_i + \mathbf{e}_i - \mathbf{z}_i)\mathbf{v}_i^\top \\ &\quad + \frac{1}{t^3} \sum_{i=1}^t \left( \frac{1}{\lambda_3 t} I_p + \frac{1}{t} N_t \right)^{-1} \mathbf{z}_i \mathbf{z}_i^\top \left( \frac{1}{\lambda_3 t} I_p + \frac{1}{t} N_t \right)^{-1} D \\ &\quad + \frac{\lambda_3}{t^3} \left( \frac{1}{t} I_p + \frac{\lambda_3}{t} N_t \right)^{-2} D. \end{aligned}$$

Then the Frobenius norm of  $\nabla f_t(D)$  can be bounded by:

$$\begin{aligned} &\|\nabla f_t(D)\|_F \\ &\leq \frac{1}{t} \sum_{i=1}^t \|D\mathbf{v}_i + \mathbf{e}_i - \mathbf{z}_i\|_2 \cdot \|\mathbf{v}_i\|_2 \\ &\quad + \frac{1}{t^3} \sum_{i=1}^t \left\| \left( \frac{1}{\lambda_3 t} I_p + \frac{1}{t} N_t \right)^{-1} \right\|_F^2 \cdot \|\mathbf{z}_i\|_2^2 \cdot \|D\|_F \\ &\quad + \frac{\lambda_3}{t^3} \left\| \left( \frac{1}{t} I_p + \frac{\lambda_3}{t} N_t \right)^{-1} \right\|_F^2 \cdot \|D\|_F. \end{aligned}$$

One can easily check that the right side of the inequality is uniformly bounded. Thus  $\|\nabla f_t(D)\|_F$  is uniformly bounded, implying that  $f_t(D)$  is uniformly Lipschitz.  $\square$

## F.2. Proof of P-Donsker

**Proposition 11.** Let  $f'_t(D) = \frac{1}{t} \sum_{i=1}^t \ell(\mathbf{z}_i, D)$  and  $f(D)$  be the expected loss function defined in (2.8). Then we have

$$\mathbb{E}[\sqrt{t} \|f'_t - f\|_\infty] = \mathcal{O}(1).$$

*Proof.* Let us consider  $\{\ell(\mathbf{z}, D)\}$  as a set of measurable functions indexed by  $D \in \mathcal{D}$ . As we showed in Proposition 7,  $\mathcal{D}$  is a compact set. Also, we have proved that  $\ell(\mathbf{z}, D)$  is uniformly Lipschitz over  $D$  (Proposition 9). Thus,  $\{\ell(\mathbf{z}, D)\}$  is P-Donsker (see the definition in Lemma 4). Furthermore, as  $\ell(\mathbf{z}, D)$  is non-negative and uniformly bounded, so is  $\ell^2(\mathbf{z}, D)$ . So we have  $\mathbb{E}_z[\ell^2(\mathbf{z}, D)]$  being uniformly bounded. Since we have verified all the hypotheses in Lemma 4, we obtain the result that

$$\mathbb{E}[\sqrt{t} \|f'_t - f\|_\infty] = \mathcal{O}(1).$$

$\square$

### F.3. Proof of convergence of $g_t(D)$

**Theorem 12** (Convergence of the surrogate function  $g_t(D_t)$ ). *The surrogate function  $g_t(D_t)$  we defined in (3.5) converges almost surely, where  $D_t$  is the solution produced by Algorithm 1.*

*Proof.* Note that  $g_t(D_t)$  can be viewed as a stochastic positive process since every term in  $g_t(D_t)$  is non-negative and the samples are drawn randomly. We define

$$u_t = g_t(D_t).$$

To show the convergence of  $u_t$ , we need to bound the difference of  $u_{t+1}$  and  $u_t$ :

$$\begin{aligned} & u_{t+1} - u_t \\ &= g_{t+1}(D_{t+1}) - g_t(D_t) \\ &= g_{t+1}(D_{t+1}) - g_{t+1}(D_t) + g_{t+1}(D_t) - g_t(D_t) \\ &= g_{t+1}(D_{t+1}) - g_{t+1}(D_t) \\ &\quad + \frac{1}{t+1} \ell(\mathbf{z}_{t+1}, D_t) - \frac{1}{t+1} g'_t(D_t) \\ &\quad + \left[ \frac{1}{t+1} \sum_{i=1}^{t+1} \frac{1}{2} \|\mathbf{u}_i\|_2^2 + \frac{\lambda_3}{2(t+1)} \|D_t - M_{t+1}\|_F^2 \right. \\ &\quad \left. - \frac{1}{t} \sum_{i=1}^t \frac{1}{2} \|\mathbf{u}_i\|_2^2 - \frac{\lambda_3}{2t} \|D_t - M_t\|_F^2 \right] \\ &= g_{t+1}(D_{t+1}) - g_{t+1}(D_t) + \frac{f'_t(D_t) - g'_t(D_t)}{t+1} \\ &\quad + \frac{\ell(\mathbf{z}_{t+1}, D_t) - f'_t(D_t)}{t+1} \\ &\quad + \left[ \frac{1}{t+1} \sum_{i=1}^{t+1} \frac{1}{2} \|\mathbf{u}_i\|_2^2 + \frac{\lambda_3}{2(t+1)} \|D_t - M_{t+1}\|_F^2 \right. \\ &\quad \left. - \frac{1}{t} \sum_{i=1}^t \frac{1}{2} \|\mathbf{u}_i\|_2^2 - \frac{\lambda_3}{2t} \|D_t - M_t\|_F^2 \right]. \end{aligned} \quad (\text{F.12})$$

Here,

$$g'_t(D_t) = \frac{1}{t} \sum_{i=1}^t \tilde{\ell}(\mathbf{z}_i, D, \mathbf{v}_i, \mathbf{e}_i). \quad (\text{F.13})$$

First, we bound the last four terms. We have

$$\begin{aligned} & \frac{1}{t+1} \sum_{i=1}^{t+1} \frac{1}{2} \|\mathbf{u}_i\|_2^2 - \frac{1}{t} \sum_{i=1}^t \frac{1}{2} \|\mathbf{u}_i\|_2^2 \\ &= \frac{-1}{t(t+1)} \sum_{i=1}^t \frac{1}{2} \|\mathbf{u}_i\|_2^2 + \frac{1}{2(t+1)} \|\mathbf{u}_{t+1}\|_2^2 \\ &\leq \frac{1}{2(t+1)} \|\mathbf{u}_{t+1}\|_2^2. \end{aligned} \quad (\text{F.14})$$

And

$$\begin{aligned} & \frac{\lambda_3}{2(t+1)} \|D_t - M_{t+1}\|_F^2 - \frac{\lambda_3}{2t} \|D_t - M_t\|_F^2 \\ &= \frac{-\lambda_3}{2t(t+1)} \|D_t - M_t\|_F^2 + \frac{\lambda_3}{2(t+1)} \|\mathbf{z}_{t+1} \mathbf{u}_{t+1}^\top\|_F^2 \\ &\quad - \frac{\lambda_3}{t+1} \text{Tr}((D_t - M_t)^\top \mathbf{z}_{t+1} \mathbf{u}_{t+1}^\top) \\ &= \frac{-\lambda_3}{2t(t+1)} \|D_t - M_t\|_F^2 + \frac{\lambda_3}{2(t+1)} \|\mathbf{z}_{t+1} \mathbf{u}_{t+1}^\top\|_F^2 \\ &\quad - \frac{\lambda_3}{t+1} \left( \|\mathbf{z}_{t+1}\|_2^2 + \frac{1}{\lambda_3} \right) \|\mathbf{u}_{t+1}\|_2^2 \\ &\leq \frac{1}{t+1} \left( \frac{\lambda_3}{2} \|\mathbf{z}_{t+1} \mathbf{u}_{t+1}^\top\|_F^2 - (\lambda_3 \|\mathbf{z}_{t+1}\|_2^2 + 1) \|\mathbf{u}_{t+1}\|_2^2 \right) \\ &\leq \frac{1}{t+1} \left( -\frac{\lambda_3}{2} \|\mathbf{z}_{t+1}\|_2^2 \|\mathbf{u}_{t+1}\|_2^2 - \|\mathbf{u}_{t+1}\|_2^2 \right), \end{aligned} \quad (\text{F.15})$$

where the first equality is derived by the fact that  $M_{t+1} = M_t + \mathbf{z}_{t+1} \mathbf{u}_{t+1}^\top$ , and the second equality is derived by the closed form solution of  $\mathbf{u}_{t+1}$  (see (3.4)).

Combining (F.14) and (F.15), we know that

$$\begin{aligned} & \frac{1}{t+1} \sum_{i=1}^{t+1} \frac{1}{2} \|\mathbf{u}_i\|_2^2 - \frac{1}{t} \sum_{i=1}^t \frac{1}{2} \|\mathbf{u}_i\|_2^2 \\ &\quad + \frac{\lambda_3}{2(t+1)} \|D_t - M_{t+1}\|_F^2 - \frac{\lambda_3}{2t} \|D_t - M_t\|_F^2 \\ &\leq \frac{1}{2(t+1)} \|\mathbf{u}_{t+1}\|_2^2 + \frac{1}{t+1} \left( -\frac{\lambda_3}{2} \|\mathbf{z}_{t+1}\|_2^2 \|\mathbf{u}_{t+1}\|_2^2 \right. \\ &\quad \left. - \|\mathbf{u}_{t+1}\|_2^2 \right) \\ &= \frac{1}{t+1} \left( -\frac{\lambda_3}{2} \|\mathbf{z}_{t+1}\|_2^2 \|\mathbf{u}_{t+1}\|_2^2 - \frac{1}{2} \|\mathbf{u}_{t+1}\|_2^2 \right) \leq 0. \end{aligned}$$

Therefore,

$$\begin{aligned} u_{t+1} - u_t &\leq g_{t+1}(D_{t+1}) - g_{t+1}(D_t) + \frac{1}{t+1} \ell(\mathbf{z}_{t+1}, D_t) \\ &\quad - \frac{1}{t+1} g'_t(D_t) \\ &= g_{t+1}(D_{t+1}) - g_{t+1}(D_t) + \frac{f'_t(D_t) - g'_t(D_t)}{t+1} \\ &\quad + \frac{\ell(\mathbf{z}_{t+1}, D_t) - f'_t(D_t)}{t+1} \\ &\leq \frac{\ell(\mathbf{z}_{t+1}, D_t) - f'_t(D_t)}{t+1}, \end{aligned}$$

where  $f'_t(D)$  is defined in Proposition 11, and the last inequality holds because  $D_{t+1}$  is the minimizer of  $g_{t+1}(D)$  and  $g'_t(D)$  is a surrogate function of  $f'_t(D)$ .

Let  $\mathcal{F}_t$  be the filtration of the past information. We take the



expectation on the above equation conditioned on  $\mathcal{F}_t$ :

$$\begin{aligned}\mathbb{E}[u_{t+1} - u_t \mid \mathcal{F}_t] &\leq \frac{\mathbb{E}[\ell(\mathbf{z}_{t+1}, D_t) \mid \mathcal{F}_t] - f'_t(D_t)}{t+1} \\ &\leq \frac{f(D_t) - f'_t(D_t)}{t+1} \\ &\leq \frac{\|f - f'_t\|_\infty}{t+1}.\end{aligned}$$

From Proposition 11, we know

$$\mathbb{E}[\|f - f'_t\|_\infty] = \mathcal{O}\left(\frac{1}{\sqrt{t}}\right).$$

Thus,

$$\begin{aligned}\mathbb{E}[\mathbb{E}[u_{t+1} - u_t \mid \mathcal{F}_t]^+] &= \mathbb{E}[\max\{\mathbb{E}[u_{t+1} - u_t \mid \mathcal{F}_t], 0\}] \\ &\leq \frac{c}{\sqrt{t}(t+1)},\end{aligned}$$

where  $c$  is some constant.

Now let us define the index set

$$\mathcal{T} = \{t \mid \mathbb{E}[u_{t+1} - u_t \mid \mathcal{F}_t] > 0\},$$

and the indicator

$$\delta_t = \begin{cases} 1, & \text{if } t \in \mathcal{T}, \\ 0, & \text{otherwise.} \end{cases}$$

We have

$$\begin{aligned}\sum_{t=1}^{\infty} \mathbb{E}[\delta_t(u_{t+1} - u_t)] &= \sum_{t \in \mathcal{T}} \mathbb{E}[u_{t+1} - u_t] \\ &= \sum_{t \in \mathcal{T}} \mathbb{E}[\mathbb{E}[u_{t+1} - u_t \mid \mathcal{F}_t]] \\ &= \sum_{t=1}^{\infty} \mathbb{E}[\mathbb{E}[u_{t+1} - u_t \mid \mathcal{F}_t]^+] \\ &\leq +\infty.\end{aligned}$$

Thus, Lemma 5 applies. That is,  $g_t(D_t)$  is a quasi-martingale and converges almost surely. Moreover,

$$\sum_{t=1}^{\infty} |\mathbb{E}[u_{t+1} - u_t \mid \mathcal{F}_t]| < +\infty, \text{ a.s.} \quad (\text{F.16})$$

□

#### F.4. Proof of Convergence of $D_t$

**Proposition 13.** *Let  $\{D_t\}_{t=1}^{\infty}$  be the basis sequence produced by the Algorithm 1. Then,*

$$\|D_{t+1} - D_t\|_F = \mathcal{O}\left(\frac{1}{t}\right). \quad (\text{F.17})$$

*Proof.* According the strong convexity of  $g_t(D)$  (Assumption 3), we have,

$$g_t(D_{t+1}) - g_t(D_t) \geq \frac{\beta_0}{2} \|D_{t+1} - D_t\|_F^2, \quad (\text{F.18})$$

On the other hand,

$$\begin{aligned}&g_t(D_{t+1}) - g_t(D_t) \\ &= g_t(D_{t+1}) - g_{t+1}(D_{t+1}) + g_{t+1}(D_{t+1}) - g_{t+1}(D_t) \\ &\quad + g_{t+1}(D_t) - g_t(D_t) \\ &\leq g_t(D_{t+1}) - g_{t+1}(D_{t+1}) + g_{t+1}(D_t) - g_t(D_t) \\ &\stackrel{\text{def}}{=} G_t(D_{t+1}) - G_t(D_t).\end{aligned} \quad (\text{F.19})$$

Note that the inequality is derived by the fact that  $g_{t+1}(D_{t+1}) - g_{t+1}(D_t) \leq 0$ , as  $D_{t+1}$  is the minimizer of  $g_{t+1}(D)$ . We denote  $g_t(D) - g_{t+1}(D)$  by  $G_t(D)$ .

By a simple calculation, we obtain the gradient of  $G_t(D)$ :

$$\begin{aligned}\nabla G_t(D) &= \nabla g_t(D) - \nabla g_{t+1}(D) \\ &= \frac{1}{t} \left[ D(\lambda_1 A_t + \lambda_3 I_d) - (\lambda_1 B_t + \lambda_3 M_t) \right] \\ &\quad - \frac{1}{t+1} \left[ D(\lambda_1 A_{t+1} + \lambda_3 I_d) - (\lambda_1 B_{t+1} + \lambda_3 M_{t+1}) \right] \\ &= \frac{1}{t} \left[ D \left( \lambda_1 A_t + \lambda_3 I_d - \frac{\lambda_1 t}{t+1} A_{t+1} - \frac{\lambda_3 t}{t+1} I_d \right) \right. \\ &\quad \left. + \frac{\lambda_1 t}{t+1} B_{t+1} - \lambda_1 B_t + \frac{\lambda_3 t}{t+1} M_{t+1} - \lambda_3 M_t \right] \\ &= \frac{1}{t} \left[ D \left( \frac{\lambda_1}{t+1} A_{t+1} - \lambda_1 \mathbf{v}_{t+1} \mathbf{v}_{t+1}^\top + \frac{\lambda_3}{t+1} I_d \right) \right. \\ &\quad \left. + \lambda_1 (\mathbf{z}_{t+1} - \mathbf{e}_{t+1}) \mathbf{v}_{t+1}^\top - \frac{\lambda_1}{t+1} B_{t+1} \right. \\ &\quad \left. + \lambda_3 \mathbf{z}_{t+1} \mathbf{u}_{t+1}^\top - \frac{\lambda_3}{t+1} M_{t+1} \right]\end{aligned}$$



So the Frobenius norm of  $\nabla G_t(D)$  follows immediately:

$$\begin{aligned}
 & \|\nabla G_t(D)\|_F \\
 & \leq \frac{1}{t} \left[ \|D\|_F \left( \lambda_1 \left\| \frac{A_{t+1}}{t+1} \right\|_F + \lambda_1 \|\mathbf{v}_{t+1} \mathbf{v}_{t+1}^\top\|_F \right. \right. \\
 & \quad \left. \left. + \frac{\lambda_3}{t+1} \|I_d\|_F \right) + \lambda_1 \|(\mathbf{z}_{t+1} - \mathbf{e}_{t+1}) \mathbf{v}_{t+1}^\top\|_F \right. \\
 & \quad \left. + \lambda_1 \left\| \frac{B_{t+1}}{t+1} \right\|_F + \lambda_3 \|\mathbf{z}_{t+1} \mathbf{u}_{t+1}^\top\|_F \right. \\
 & \quad \left. + \frac{\lambda_3}{t+1} \|M_{t+1}\|_F \right] \\
 & = \frac{1}{t} \left[ \|D\|_F \left( \lambda_1 \left\| \frac{A_{t+1}}{t+1} \right\|_F + \lambda_1 \|\mathbf{v}_{t+1} \mathbf{v}_{t+1}^\top\|_F \right) \right. \\
 & \quad \left. + \lambda_1 \|(\mathbf{z}_{t+1} - \mathbf{e}_{t+1}) \mathbf{v}_{t+1}^\top\|_F \right. \\
 & \quad \left. + \lambda_1 \left\| \frac{B_{t+1}}{t+1} \right\|_F + \lambda_3 \|\mathbf{z}_{t+1} \mathbf{u}_{t+1}^\top\|_F \right] \\
 & \quad + \frac{\lambda_3}{t(t+1)} \left[ \|I_d\|_F + \|M_{t+1}\|_F \right].
 \end{aligned}$$

We know from Proposition 7 that all the terms in the above equation are uniformly bounded. Thus, there exist constants  $c_1$ ,  $c_2$  and  $c_3$ , such that

$$\|\nabla G_t(D)\|_F \leq \frac{1}{t} [c_1 \|D\|_F + c_2] + \frac{c_3}{t(t+1)}.$$

According to the first order Taylor expansion,

$$\begin{aligned}
 & G_t(D_{t+1}) - G_t(D_t) \\
 & = \text{Tr} \left( (D_{t+1} - D_t)^\top \nabla G_t(\alpha D_t + (1-\alpha) D_{t+1}) \right) \\
 & \leq \|D_{t+1} - D_t\|_F \cdot \|\nabla G_t(\alpha D_t + (1-\alpha) D_{t+1})\|_F,
 \end{aligned}$$

where  $\alpha$  is a constant between 0 and 1. According to Proposition 7,  $D_t$  and  $D_{t+1}$  are uniformly bounded, so  $\alpha D_t + (1-\alpha) D_{t+1}$  is uniformly bounded. Thus, there exists a constant  $c_4$ , such that

$$\|\nabla G_t(\alpha D_t + (1-\alpha) D_{t+1})\|_F \leq \frac{c_4}{t} + \frac{c_3}{t(t+1)},$$

resulting in

$$G_t(D_{t+1}) - G_t(D_t) \leq \left( \frac{c_4}{t} + \frac{c_3}{t(t+1)} \right) \|D_{t+1} - D_t\|_F.$$

Combining (F.18), (F.19) and the above equation, we have

$$\|D_{t+1} - D_t\|_F = \frac{2c_4}{\beta_0} \cdot \frac{1}{t} + \frac{2c_3}{\beta_0} \cdot \frac{1}{t(t+1)}.$$

## F.5. Proof for convergence of $f_t(D_t)$

**Theorem 14** (Convergence of  $f_t(D_t)$ ). *Let  $f_t(D_t)$  be the empirical loss function defined in (2.6) and  $D_t$  be the solution produced by the Algorithm 1. Let  $b_t = g_t(D_t) - f_t(D_t)$ . Then,  $b_t$  converges almost surely to 0. Thus,  $f_t(D_t)$  converges almost surely to the same limit of  $g_t(D_t)$ .*

*Proof.* Let  $f'_t(D)$  and  $g'_t(D)$  be those defined in Proposition 11 and Theorem 12 respectively. Then,

$$\begin{aligned}
 b_t & = g_t(D_t) - f_t(D_t) \\
 & = g'_t(D_t) - f'_t(D_t) + \left[ \frac{1}{t} \sum_{i=1}^t \frac{1}{2} \|\mathbf{u}_i\|_2^2 + \frac{\lambda_3}{2t} \|D_t - M_t\|_F^2 \right. \\
 & \quad \left. - \frac{1}{t^3} \sum_{i=1}^t \frac{1}{2} \left\| D_t^\top \left( \frac{1}{\lambda_3 t} I_p + \frac{1}{t} N_t \right)^{-1} \mathbf{z}_i \right\|_2^2 \right. \\
 & \quad \left. - \frac{\lambda_3}{2t^3} \left\| \left( \frac{1}{t} I_p + \frac{\lambda_3}{t} N_t \right)^{-1} D_t \right\|_F^2 \right] \\
 & = g'_t(D_t) - f'_t(D_t) + q_t(D_t),
 \end{aligned}$$

where  $q_t(D_t)$  denotes the last four terms. Combining F.12, we have

$$\begin{aligned}
 \frac{b_t}{t+1} & = \frac{g'_t(D_t) - f'_t(D_t)}{t+1} + \frac{q_t(D_t)}{t+1} \\
 & = g_{t+1}(D_{t+1}) - g_{t+1}(D_t) + \frac{\ell(\mathbf{z}_{t+1}, D_t) - f'_t(D_t)}{t+1} \\
 & \quad + u_t - u_{t+1} \\
 & \quad + \left[ \frac{q_t(D_t)}{t+1} + \frac{1}{t+1} \sum_{i=1}^{t+1} \frac{1}{2} \|\mathbf{u}_i\|_2^2 \right. \\
 & \quad \left. + \frac{\lambda_3}{2(t+1)} \|D_t - M_{t+1}\|_F^2 - \frac{1}{t} \sum_{i=1}^t \frac{1}{2} \|\mathbf{u}_i\|_2^2 \right. \\
 & \quad \left. - \frac{\lambda_3}{2t} \|D_t - M_t\|_F^2 \right].
 \end{aligned}$$

Note that we naturally have

$$\begin{aligned}
 \frac{q_t(D_t)}{t+1} & \leq \frac{1}{t(t+1)} \sum_{i=1}^t \frac{1}{2} \|\mathbf{u}_i\|_2^2 + \frac{\lambda_3}{2t(t+1)} \|D_t - M_t\|_F^2 \\
 & \leq \frac{1}{t(t+1)} \sum_{i=1}^t \frac{1}{2} \|\mathbf{u}_i\|_2^2 + \frac{c}{2t(t+1)},
 \end{aligned}$$

where the second inequality holds as  $D_t$  and  $M_t$  are both uniformly bounded (see Proposition 7).  $\square$

Also, from (F.14), we know

$$\begin{aligned} & \frac{1}{t+1} \sum_{i=1}^{t+1} \frac{1}{2} \|\mathbf{u}_i\|_2^2 - \frac{1}{t} \sum_{i=1}^t \|\mathbf{u}_i\|_2^2 \\ &= \frac{-1}{t(t+1)} \sum_{i=1}^t \frac{1}{2} \|\mathbf{u}_i\|_2^2 + \frac{1}{2(t+1)} \|\mathbf{u}_{t+1}\|_2^2. \end{aligned}$$

And from (F.15)

$$\begin{aligned} & \frac{\lambda_3}{2(t+1)} \|D_t - M_{t+1}\|_F^2 - \frac{\lambda_3}{2t} \|D_t - M_t\|_F^2 \\ & \leq \frac{1}{t+1} \left( -\frac{\lambda_3}{2} \|\mathbf{z}_{t+1}\|_2^2 \|\mathbf{u}_{t+1}\|_2^2 - \|\mathbf{u}_{t+1}\|_2^2 \right). \end{aligned}$$

Thus,

$$\begin{aligned} & \frac{g_t(D_t)}{t+1} + \frac{1}{t+1} \sum_{i=1}^{t+1} \frac{1}{2} \|\mathbf{u}_i\|_2^2 \\ & + \frac{\lambda_3}{2(t+1)} \|D_t - M_{t+1}\|_F^2 \\ & - \frac{1}{t} \sum_{i=1}^t \frac{1}{2} \|\mathbf{u}_i\|_2^2 - \frac{\lambda_3}{2t} \|D_t - M_t\|_F^2 \\ & \leq \frac{c}{2t(t+1)} + \frac{1}{2(t+1)} \|\mathbf{u}_{t+1}\|_2^2 \\ & + \frac{1}{t+1} \left( -\frac{\lambda_3}{2} \|\mathbf{z}_{t+1}\|_2^2 \|\mathbf{u}_{t+1}\|_2^2 - \|\mathbf{u}_{t+1}\|_2^2 \right) \\ & = \frac{c}{2t(t+1)} - \frac{1}{2(t+1)} \|\mathbf{u}_{t+1}\|_2^2 \\ & - \frac{\lambda_3}{2(t+1)} \|\mathbf{z}_{t+1}\|_2^2 \|\mathbf{u}_{t+1}\|_2^2 \\ & \leq \frac{c}{2t(t+1)}. \end{aligned}$$

Therefore,

$$\begin{aligned} & \frac{b_t}{t+1} \\ & \leq g_{t+1}(D_{t+1}) - g_{t+1}(D_t) + \frac{\ell(\mathbf{z}_{t+1}, D_t) - f'_t(D_t)}{t+1} \\ & + u_t - u_{t+1} + \frac{c}{2t(t+1)} \\ & \leq \frac{\ell(\mathbf{z}_{t+1}, D_t) - f'_t(D_t)}{t+1} + u_t - u_{t+1} + \frac{c}{2t(t+1)}. \end{aligned}$$

By taking the expectation conditioned on the past information  $\mathcal{F}_t$ , we have

$$\begin{aligned} \frac{b_t}{t+1} & \leq \frac{f(D_t) - f_t(D_t)}{t+1} + \mathbb{E}[u_t - u_{t+1} | \mathcal{F}_t] + \frac{c}{2t(t+1)} \\ & \leq \frac{c_1}{\sqrt{t}(t+1)} + |\mathbb{E}[u_t - u_{t+1} | \mathcal{F}_t]| + \frac{c}{2t(t+1)}, \end{aligned}$$

where the second inequality holds by applying Proposition 11. Thus,

$$\begin{aligned} & \sum_{t=1}^{\infty} \frac{b_t}{t+1} \\ & \leq \sum_{t=1}^{\infty} \frac{c_1}{\sqrt{t}(t+1)} + \sum_{t=1}^{\infty} |\mathbb{E}[u_t - u_{t+1} | \mathcal{F}_t]| \\ & + \sum_{t=1}^{\infty} \frac{c}{2t(t+1)} \\ & < +\infty. \end{aligned}$$

Here, the last inequality is derived by applying (F.16).

Next, we examine the difference between  $b_{t+1}$  and  $b_t$ :

$$\begin{aligned} & |b_{t+1} - b_t| \\ & = |g_{t+1}(D_{t+1}) - f_{t+1}(D_{t+1}) - g_t(D_t) + f_t(D_t)| \\ & \leq |g_{t+1}(D_{t+1}) - g_t(D_{t+1})| + |g_t(D_{t+1}) - g_t(D_t)| \\ & + |f_{t+1}(D_{t+1}) - f_t(D_{t+1})| + |f_t(D_{t+1}) - f_t(D_t)|. \end{aligned} \tag{F.20}$$

For the first term on the right hand side,

$$\begin{aligned} & |g_{t+1}(D_{t+1}) - g_t(D_{t+1})| \\ & = \left| g'_{t+1}(D_{t+1}) - g'_t(D_{t+1}) + \frac{1}{t+1} \sum_{i=1}^{t+1} \frac{1}{2} \|\mathbf{u}_i\|_2^2 \right. \\ & \quad \left. - \frac{1}{t} \sum_{i=1}^t \frac{1}{2} \|\mathbf{u}_i\|_2^2 + \frac{\lambda_3}{2(t+1)} \|D_{t+1} - M_{t+1}\|_F^2 \right. \\ & \quad \left. - \frac{\lambda_3}{2t} \|D_{t+1} - M_t\|_F^2 \right| \\ & = \left| g'_{t+1}(D_{t+1}) - g'_t(D_{t+1}) - \frac{1}{t(t+1)} \sum_{i=1}^t \frac{1}{2} \|\mathbf{u}_i\|_2^2 \right. \\ & \quad \left. - \frac{1}{2(t+1)} \|\mathbf{u}_{t+1}\|_2^2 \right. \\ & \quad \left. - \frac{\lambda_3}{2t(t+1)} \|D_{t+1} - M_t\|_F^2 - \frac{\lambda_3}{2(t+1)} \|\mathbf{z}_{t+1} \mathbf{u}_{t+1}^\top\|_F^2 \right| \\ & \leq |g'_{t+1}(D_{t+1}) - g'_t(D_{t+1})| + \frac{1}{t(t+1)} \sum_{i=1}^t \frac{1}{2} \|\mathbf{u}_i\|_2^2 \\ & + \frac{1}{2(t+1)} \|\mathbf{u}_{t+1}\|_2^2 + \frac{\lambda_3}{2t(t+1)} \|D_{t+1} - M_t\|_F^2 \\ & + \frac{\lambda_3}{2(t+1)} \|\mathbf{z}_{t+1} \mathbf{u}_{t+1}^\top\|_F^2 \\ & \stackrel{\zeta_1}{\leq} |g'_{t+1}(D_{t+1}) - g'_t(D_{t+1})| + \frac{c_1}{t+1} \\ & = \left| \frac{1}{t+1} \ell(\mathbf{z}_{t+1}, D_{t+1}) - \frac{1}{t+1} g'_t(D_{t+1}) \right| + \frac{c_1}{t+1} \\ & \stackrel{\zeta_2}{\leq} \frac{c_2}{t+1}, \end{aligned}$$

where  $c_1$  and  $c_2$  are some uniform constants. Note that  $\zeta_1$  holds because all the  $\mathbf{u}_i$ 's,  $D_{t+1}$ ,  $M_t$  and  $\mathbf{z}_{t+1}$  are uniformly bounded (see Proposition 7), and  $\zeta_2$  holds because  $\ell(\mathbf{z}_{t+1}, D_{t+1})$  and  $g'_t(D_{t+1})$  are uniformly bounded (see Corollary 8).

For the third term on the right hand side of (F.20), we can similarly derive

$$\begin{aligned} & |f_{t+1}(D_{t+1}) - f_t(D_{t+1})| \\ & \leq |f'_{t+1}(D_{t+1}) - f'_t(D_{t+1})| + \frac{c_3}{t+1} \\ & = \left| \frac{1}{t+1} \ell(\mathbf{z}_{t+1}, D_{t+1}) - \frac{1}{t+1} f'_t(D_{t+1}) \right| + \frac{c_3}{t+1} \\ & \leq \frac{c_4}{t+1}, \end{aligned}$$

where  $c_3$  and  $c_4$  are some uniform constants, and  $\zeta_3$  holds as  $\ell(\mathbf{z}_{t+1}, D_{t+1})$  and  $f'_t(D_{t+1})$  are both uniformly bounded (see Corollary 10).

From Corollary 8 and Corollary 10, we know that both  $g_t(D)$  and  $f_t(D)$  are uniformly Lipschitz. That is, there exists uniform constants  $\kappa_1, \kappa_2$ , such that

$$\begin{aligned} |g_t(D_{t+1}) - g_t(D_t)| & \leq \kappa_1 \|D_{t+1} - D_t\|_F \stackrel{\zeta_4}{\leq} \frac{\kappa_3}{t+1}, \\ |f_t(D_{t+1}) - f_t(D_t)| & \leq \kappa_2 \|D_{t+1} - D_t\|_F \stackrel{\zeta_5}{\leq} \frac{\kappa_4}{t+1}. \end{aligned}$$

Here,  $\zeta_4$  and  $\zeta_5$  are derived by applying Proposition 13 and  $\kappa_3$  and  $\kappa_4$  are some uniform constants.

Finally, we have a bound for (F.20):

$$|b_{t+1} - b_t| \leq \frac{\kappa_0}{t+1},$$

where  $\kappa_0$  is some uniform constant.

By applying Lemma 6, we conclude that  $\{b_t\}$  converges to zero. That is,

$$\lim_{t \rightarrow +\infty} g_t(D_t) - f_t(D_t) = 0.$$

Since we have proved in Theorem 12 that  $g_t(D_t)$  converges almost surely, we conclude that  $f_t(D_t)$  converges almost surely to the same limit of  $g_t(D_t)$ .  $\square$

**Theorem 15** (Convergence of  $f(D_t)$ ). *Let  $f(D)$  be the expected loss function we defined in (2.8) and let  $D_t$  be the optimal solution produced by Algorithm 1. Then  $f(D_t)$  converges almost surely to the same limit of  $f_t(D_t)$  (or,  $g_t(D_t)$ ).*

*Proof.* According to the central limit theorem, we know that  $\sqrt{t}(f(D_t) - f_t(D_t))$  is bounded, implying

$$\lim_{t \rightarrow +\infty} f(D_t) - f_t(D_t) = 0, \quad a.s.$$

$\square$

## F.6. Proof of gradient of $f(D)$

**Proposition 16** (Gradient of  $f(D)$ ). *Let  $f(D)$  be the expected loss function which is defined in (2.8). Then,  $f(D)$  is continuously differentiable and  $\nabla f(D) = \mathbb{E}_{\mathbf{z}}[\nabla_D \ell(\mathbf{z}, D)]$ . Moreover,  $\nabla f(D)$  is uniformly Lipschitz on  $\mathcal{D}$ .*

*Proof.* We have shown in Proposition 9 that  $\ell(\mathbf{z}, D)$  is continuously differentiable,  $f(D)$  is also continuously differentiable and we have  $\nabla f(D) = \mathbb{E}_{\mathbf{z}}[\nabla_D \ell(\mathbf{z}, D)]$ .

Next, we prove the Lipschitz of  $\nabla f(D)$ . Let  $\mathbf{v}'(\mathbf{z}', D')$  and  $\mathbf{e}'(\mathbf{z}', D')$  be the minimizer of  $\ell(\mathbf{z}', D', \mathbf{v}, \mathbf{e})$ . Since  $\tilde{\ell}(\mathbf{z}, D, \mathbf{v}, \mathbf{e})$  has a unique minimum and is continuous in  $\mathbf{z}, D, \mathbf{v}$  and  $\mathbf{e}$ ,  $\mathbf{v}'(\mathbf{z}', D')$  and  $\mathbf{e}'(\mathbf{z}', D')$  is continuous in  $\mathbf{z}$  and  $D$ .

Let  $\Lambda = \{j \mid e'_j \neq 0\}$ . According the first order optimality condition, we know that

$$\frac{\partial \tilde{\ell}(\mathbf{z}, D, \mathbf{v}, \mathbf{e})}{\partial \mathbf{e}} = 0,$$

which implies

$$\lambda_1(\mathbf{z} - D\mathbf{v} - \mathbf{e}) \in \lambda_2 \|\mathbf{e}\|_1.$$

Hence,

$$|(z - D\mathbf{v} - \mathbf{e})_j| = \frac{\lambda_2}{\lambda_1}, \quad \forall j \in \Lambda.$$

Since  $\mathbf{z} - D\mathbf{v} - \mathbf{e}$  is continuous in  $\mathbf{z}$  and  $D$ , there exists an open neighborhood  $\mathcal{V}$ , such that for all  $(\mathbf{z}'', D'') \in \mathcal{V}$ , if  $j \notin \Lambda$ , then  $|(z'' - D''\mathbf{v}'' - \mathbf{e}'')_j| < \frac{\lambda_2}{\lambda_1}$  and  $e''_j = 0$ . That is, the support set of  $\mathbf{e}'$  will not change.

Let us denote  $H = [D \ I_p]$ ,  $\mathbf{r} = [\mathbf{v}^\top \ \mathbf{e}^\top]^\top$  and define the function

$$\begin{aligned} \tilde{\ell}(\mathbf{z}, H, \mathbf{r}_\Lambda) & = \frac{\lambda_1}{2} \|\mathbf{z} - H_\Lambda \mathbf{r}_\Lambda\|_2^2 + \frac{1}{2} \|[I \ 0] \mathbf{r}_\Lambda\|_2^2 \\ & \quad + \lambda_2 \|[0 \ I] \mathbf{r}_\Lambda\|_1 \end{aligned}$$

Since  $\tilde{\ell}(\mathbf{z}, D_\Lambda, \cdot)$  is strongly convex, there exists a uniform constant  $\kappa_1$ , such that for all  $\mathbf{r}'_\Lambda$ ,

$$\begin{aligned} & \tilde{\ell}(\mathbf{z}', H'_\Lambda, \mathbf{r}''_\Lambda) - \tilde{\ell}(\mathbf{z}', H'_\Lambda, \mathbf{r}'_\Lambda) \\ & \geq \kappa_1 \|\mathbf{r}''_\Lambda - \mathbf{r}'_\Lambda\|_2^2 \\ & = \kappa_1 \left( \|\mathbf{v}'' - \mathbf{v}'\|_2^2 + \|\mathbf{e}''_\Lambda - \mathbf{e}'_\Lambda\|_2^2 \right). \end{aligned} \quad (\text{F.21})$$

On the other hand,

$$\begin{aligned} & \tilde{\ell}(\mathbf{z}', H'_\Lambda, \mathbf{r}'_\Lambda) - \tilde{\ell}(\mathbf{z}', H'_\Lambda, \mathbf{r}'_\Lambda) \\ & = \tilde{\ell}(\mathbf{z}', H'_\Lambda, \mathbf{r}'_\Lambda) - \tilde{\ell}(\mathbf{z}'', H''_\Lambda, \mathbf{r}''_\Lambda) \\ & \quad + \tilde{\ell}(\mathbf{z}'', H''_\Lambda, \mathbf{r}''_\Lambda) - \tilde{\ell}(\mathbf{z}'', D'_\Lambda, \mathbf{r}'_\Lambda) \\ & \leq \tilde{\ell}(\mathbf{z}', H'_\Lambda, \mathbf{r}'_\Lambda) - \tilde{\ell}(\mathbf{z}'', H''_\Lambda, \mathbf{r}''_\Lambda) \\ & \quad + \tilde{\ell}(\mathbf{z}'', H''_\Lambda, \mathbf{r}'_\Lambda) - \tilde{\ell}(\mathbf{z}'', H''_\Lambda, \mathbf{r}''_\Lambda), \end{aligned} \quad (\text{F.22})$$

where the last inequality holds because  $\mathbf{r}''$  is the minimizer of  $\tilde{\ell}(\mathbf{z}'', H'', \mathbf{r})$ .

We shall prove that  $\tilde{\ell}(\mathbf{z}', H'_\Lambda, \mathbf{r}_\Lambda) - \tilde{\ell}(\mathbf{z}'', H''_\Lambda, \mathbf{r}_\Lambda)$  is Lipschitz w.r.t.  $\mathbf{r}$ , which implies the Lipschitz of  $\mathbf{v}'(\mathbf{z}, D)$  and  $\mathbf{e}'(\mathbf{z}, D)$ .

$$\begin{aligned} & \nabla_{\mathbf{r}} \left( \tilde{\ell}(\mathbf{z}', H'_\Lambda, \mathbf{r}_\Lambda) - \tilde{\ell}(\mathbf{z}'', H''_\Lambda, \mathbf{r}_\Lambda) \right) \\ &= \lambda_1 \left[ H'_\Lambda{}^\top (H'_\Lambda - H''_\Lambda) + (H'_\Lambda - H''_\Lambda)^\top H''_\Lambda \right. \\ & \quad \left. + H'_\Lambda{}^\top (\mathbf{z}'' - \mathbf{z}') + (H''_\Lambda - H'_\Lambda)^\top \mathbf{z}'' \right]. \end{aligned}$$

Note that  $\|H'_\Lambda\|_F$ ,  $\|H''_\Lambda\|_F$  and  $\mathbf{z}''$  are all uniformly bounded. Hence, there exists uniform constants  $c_1$  and  $c_2$ , such that

$$\begin{aligned} & \left\| \nabla_{\mathbf{r}} \left( \tilde{\ell}(\mathbf{z}', H'_\Lambda, \mathbf{r}_\Lambda) - \tilde{\ell}(\mathbf{z}'', H''_\Lambda, \mathbf{r}_\Lambda) \right) \right\|_2 \\ & \leq c_1 \|H'_\Lambda - H''_\Lambda\|_F + c_2 \|\mathbf{z}' - \mathbf{z}''\|_2, \end{aligned}$$

which implies that  $\tilde{\ell}(\mathbf{z}', H'_\Lambda, \mathbf{r}_\Lambda) - \tilde{\ell}(\mathbf{z}'', H''_\Lambda, \mathbf{r}_\Lambda)$  is Lipschitz with Lipschitz constant  $c(H'_\Lambda, H''_\Lambda, \mathbf{z}', \mathbf{z}'') = c_1 \|H'_\Lambda - H''_\Lambda\|_F + c_2 \|\mathbf{z}' - \mathbf{z}''\|_2$ . Combining this fact with (F.21) and (F.22), we obtain

$$\kappa_1 \|\mathbf{r}''_\Lambda - \mathbf{r}'_\Lambda\|_2^2 \leq c(H'_\Lambda, H''_\Lambda, \mathbf{z}', \mathbf{z}'') \|\mathbf{r}''_\Lambda - \mathbf{r}'_\Lambda\|_2.$$

Therefore,  $\mathbf{r}(\mathbf{z}, D)$  is Lipschitz and so are  $\mathbf{v}(\mathbf{z}, D)$  and  $\mathbf{e}(\mathbf{z}, D)$ . Note that according to Proposition 9,

$$\begin{aligned} & \nabla f(D') - \nabla f(D'') \\ &= \mathbb{E}_{\mathbf{z}} \left[ (H' \mathbf{r}' - \mathbf{z}) \mathbf{v}'^\top - (H'' \mathbf{r}'' - \mathbf{z}) \mathbf{v}''^\top \right] \\ &= \mathbb{E}_{\mathbf{z}} \left[ H' \mathbf{r}' (\mathbf{v}' - \mathbf{v}'')^\top + (H' - H'') \mathbf{r}' \mathbf{v}''^\top \right. \\ & \quad \left. + H'' (\mathbf{r}' - \mathbf{r}'') \mathbf{v}''^\top + \mathbf{z} (\mathbf{v}'' - \mathbf{v}')^\top \right]. \end{aligned}$$

Thus,

$$\begin{aligned} & \|\nabla f(D') - \nabla f(D'')\|_F \\ & \stackrel{\zeta_1}{\leq} \mathbb{E}_{\mathbf{z}} \left[ \|H' \mathbf{r}'\|_2 \|\mathbf{v}' - \mathbf{v}''\|_2 + \|H' - H''\|_F \|\mathbf{r}' \mathbf{v}''^\top\|_F \right. \\ & \quad \left. + \|H''\|_F \|\mathbf{r}' - \mathbf{r}''\|_2 \|\mathbf{v}''\|_2 + \|\mathbf{z}\|_2 \|\mathbf{v}' - \mathbf{v}''\|_2 \right] \\ & \stackrel{\zeta_2}{\leq} \mathbb{E}_{\mathbf{z}} \left[ (\gamma_1 + \gamma_2 \|\mathbf{z}\|_2) \|H' - H''\|_F \right] \\ & \stackrel{\zeta_3}{\leq} \gamma_0 \|D' - D''\|_F, \end{aligned}$$

where  $\gamma_0$ ,  $\gamma_1$  and  $\gamma_2$  are all uniform constants. Here,  $\zeta_1$  holds because for any function  $s(\mathbf{z})$ , we have  $\|\mathbb{E}_{\mathbf{z}}[s(\mathbf{z})]\|_F \leq \mathbb{E}_{\mathbf{z}}[\|s(\mathbf{z})\|_F]$ .  $\zeta_2$  is derived by using the result that  $\mathbf{r}(\mathbf{z}, H)$  and  $\mathbf{v}(\mathbf{z}, H)$  are both Lipschitz and  $H'$ ,  $H''$ ,  $\mathbf{r}'$ ,  $\mathbf{r}''$ ,  $\mathbf{v}'$  and  $\mathbf{v}''$  are all uniformly bounded.  $\zeta_3$  holds because  $\mathbf{z}$  is uniformly bounded and actually  $\|H' - H''\|_F = \|D' - D''\|_F$ . Thus, we complete the proof.  $\square$

## E.7. Proof of stationary point

**Theorem 17** (Convergence of  $D_t$ ). *Let  $\{D_t\}$  be the optimal basis produced by Algorithm 1 and let  $f(D)$  be the expected loss function defined in (2.8). Then  $D_t$  converges to a stationary point of  $f(D)$  when  $t$  goes to infinity.*

*Proof.* Since  $\frac{1}{t}A_t$  and  $\frac{1}{t}B_t$  are uniformly bounded (Proposition 7), there exist sub-sequences of  $\{\frac{1}{t}A_t\}$  and  $\{\frac{1}{t}B_t\}$  that converge to  $A_\infty$  and  $B_\infty$  respectively. Then  $D_t$  will converge to  $D_\infty$ . Let  $W$  be an arbitrary matrix in  $\mathbb{R}^{p \times d}$  and  $\{h_k\}$  be any positive sequence that converges to zero.

As  $g_t$  is a surrogate function of  $f_t$ , for all  $t$  and  $k$ , we have

$$g_t(D_t + h_k W) \geq f_t(D_t + h_k W).$$

Let  $t$  tend to infinity, and note that  $f(D) = \lim_{t \rightarrow \infty} f_t(D)$ , we have

$$g_\infty(D_\infty + h_k W) \geq f(D_\infty + h_k W).$$

Note that the Lipschitz of  $\nabla f$  indicates that the second derivative of  $f(D)$  is uniformly bounded. By a simple calculation, we can also show that it also holds for  $g_t(D)$ . This fact implies that we can take the first order Taylor expansion for both  $g_t(D)$  and  $f(D)$  even when  $t$  tends to infinity (because the second order derivatives of them always exist). That is,

$$\begin{aligned} & \text{Tr}(h_k W^\top \nabla g_\infty(D_\infty)) + o(h_k W) \\ & \geq \text{Tr}(h_k W^\top \nabla f(D_\infty)) + o(h_k W) \end{aligned}$$

By multiplying  $\frac{1}{h_k \|W\|_F}$  on both sides and note that  $\{h_k\}$  is a positive sequence, it follows that

$$\begin{aligned} & \text{Tr} \left( \frac{1}{\|W\|_F} W^\top \nabla g_\infty(D_\infty) \right) + \frac{o(h_k W)}{h_k \|W\|_F} \\ & \geq \text{Tr} \left( \frac{1}{\|W\|_F} W^\top \nabla f(D_\infty) \right) + \frac{o(h_k W)}{h_k \|W\|_F}. \end{aligned}$$

Now let  $k$  go to infinity,

$$\text{Tr} \left( \frac{1}{\|W\|_F} W^\top \nabla g_\infty(D_\infty) \right) \geq \text{Tr} \left( \frac{1}{\|W\|_F} W^\top \nabla f(D_\infty) \right).$$

Note that this inequality holds for any matrix  $W \in \mathbb{R}^{p \times d}$ , so we actually have

$$\nabla g_\infty(D_\infty) = \nabla f(D_\infty).$$

As  $D_\infty$  is the minimizer of  $g_\infty(D)$ , we have

$$\nabla f(D_\infty) = \nabla g_\infty(D_\infty) = 0.$$

$\square$

## References

- Avron, Haim, Kale, Satyen, Kasiviswanathan, Shiva Prasad, and Sindhvani, Vikas. Efficient and practical stochastic subgradient descent for nuclear norm regularization. In *Proceedings of the 29th International Conference on Machine Learning*, 2012.
- Bertsekas, Dimitri P. *Nonlinear programming*. Athena Scientific, 1999.
- Bonnans, J. Frédéric and Shapiro, Alexander. Optimization problems with perturbations: A guided tour. *SIAM Review*, 40(2):228–264, 1998.
- Bottou, Léon. Online learning and stochastic approximations. *On-line learning in neural networks*, 17(9), 1998.
- Burer, Samuel and Monteiro, Renato D. C. Local minima and convergence in low-rank semidefinite programming. *Mathematical Programming*, 103(3):427–444, 2005.
- Cai, Jian-Feng, Candès, Emmanuel J., and Shen, Zuowei. A singular value thresholding algorithm for matrix completion. *SIAM Journal on Optimization*, 20(4):1956–1982, 2010.
- Candès, Emmanuel J. and Recht, Benjamin. Exact matrix completion via convex optimization. *Foundations of Computational Mathematics*, 9(6):717–772, 2009.
- Candès, Emmanuel J., Li, Xiaodong, Ma, Yi, and Wright, John. Robust principal component analysis? *Journal of the ACM*, 58(3):11, 2011.
- Defazio, Aaron, Bach, Francis R., and Lacoste-Julien, Simon. SAGA: A fast incremental gradient method with support for non-strongly convex composite objectives. In *Neural Information Processing Systems*, pp. 1646–1654, 2014.
- Elhamifar, Ehsan and Vidal, René. Sparse subspace clustering. In *IEEE Computer Society Conference on Computer Vision and Pattern Recognition*, pp. 2790–2797, 2009.
- Eriksson, Brian, Balzano, Laura, and Nowak, Robert D. High-rank matrix completion and subspace clustering with missing data. *CoRR*, abs/1112.5629, 2011.
- Fazel, Maryam, Hindi, Haitham, and Boyd, Stephen P. A rank minimization heuristic with application to minimum order system approximation. In *Proceedings of the American Control Conference*, volume 6, pp. 4734–4739. IEEE, 2001.
- Feng, Jiashi, Xu, Huan, and Yan, Shuicheng. Online robust PCA via stochastic optimization. In *Proceedings of the 27th Annual Conference on Neural Information Processing Systems*, pp. 404–412, 2013.
- Guo, Han, Qiu, Chenlu, and Vaswani, Namrata. An online algorithm for separating sparse and low-dimensional signal sequences from their sum. *IEEE Trans. Signal Processing*, 62(16):4284–4297, 2014.
- Hsieh, Cho-Jui and Olsen, Peder A. Nuclear norm minimization via active subspace selection. In *Proceedings of the 31st International Conference on Machine Learning*, pp. 575–583, 2014.
- Jaggi, Martin and Sulovský, Marek. A simple algorithm for nuclear norm regularized problems. In *Proceedings of the 27th International Conference on Machine Learning*, pp. 471–478, 2010.
- Lin, Zhouchen, Chen, Minming, and Ma, Yi. The augmented lagrange multiplier method for exact recovery of corrupted low-rank matrices. *arXiv preprint arXiv:1009.5055*, 2010.
- Liu, Guangcan and Li, Ping. Recovery of coherent data via low-rank dictionary pursuit. In *Proceedings of the 28th Annual Conference on Neural Information Processing Systems*, pp. 1206–1214, 2014.
- Liu, Guangcan, Lin, Zhouchen, Yan, Shuicheng, Sun, Ju, Yu, Yong, and Ma, Yi. Robust recovery of subspace structures by low-rank representation. *IEEE Trans. Pattern Analysis and Machine Intelligence*, 35(1):171–184, 2013.
- Mairal, Julien, Bach, Francis R., Ponce, Jean, and Sapiro, Guillermo. Online learning for matrix factorization and sparse coding. *Journal of Machine Learning Research*, 11:19–60, 2010.
- Mardani, Morteza, Mateos, Gonzalo, and Giannakis, Georgios B. Subspace learning and imputation for streaming big data matrices and tensors. *IEEE Trans. Signal Processing*, 63(10):2663–2677, 2015.
- Ng, Andrew Y., Jordan, Michael I., and Weiss, Yair. On spectral clustering: Analysis and an algorithm. In *Proceedings of the 15th Annual Conference on Neural Information Processing Systems*, pp. 849–856, 2001.
- Qiu, Chenlu, Vaswani, Namrata, Lois, Brian, and Hogben, Leslie. Recursive robust PCA or recursive sparse recovery in large but structured noise. *IEEE Trans. Information Theory*, 60(8):5007–5039, 2014.
- Recht, Benjamin, Fazel, Maryam, and Parrilo, Pablo A. Guaranteed minimum-rank solutions of linear matrix equations via nuclear norm minimization. *SIAM Review*, 52(3):471–501, 2010.

- Richtárik, Peter and Takác, Martin. Iteration complexity of randomized block-coordinate descent methods for minimizing a composite function. *Mathematical Programming*, 144(1-2):1–38, 2014.
- Shen, Jie and Li, Ping. Learning structured low-rank representation via matrix factorization. In *Proceedings of the 19th International Conference on Artificial Intelligence and Statistics*, pp. 500–509, 2016.
- Soltanolkotabi, Mahdi and Candès, Emmanuel J. A geometric analysis of subspace clustering with outliers. *The Annals of Statistics*, 40:2195–2238, 2012.
- Soltanolkotabi, Mahdi, Elhamifar, Ehsan, and Candès, Emmanuel J. Robust subspace clustering. *The Annals of Statistics*, 42(2):669–699, 2014.
- van der Vaart, A.W. *Asymptotic statistics*. Cambridge University Press, 2000.
- Vidal, René. A tutorial on subspace clustering. *IEEE Signal Processing Magazine*, 28(2):52–68, 2010.
- Wang, Yu-Xiang, Xu, Huan, and Leng, Chenlei. Provable subspace clustering: When LRR meets SSC. In *Proceedings of 27th Annual Conference on Neural Information Processing Systems*, pp. 64–72, 2013.
- Xiao, Lin and Zhang, Tong. A proximal stochastic gradient method with progressive variance reduction. *SIAM Journal on Optimization*, 24(4):2057–2075, 2014.
- Xu, Huan, Caramanis, Constantine, and Mannor, Shie. Principal component analysis with contaminated data: The high dimensional case. In *Proceedings of the 23rd Conference on Learning Theory*, pp. 490–502, 2010.
